# Supplementary material for: Pepsinogen C Interacts with IQGAP1 to Inhibit the Metastasis of Gastric Cancer Cells by Suppressing Rho-GTPase Pathway
Source: MDPI journal article supplement (doi:10.3390/cancers16101796), 2024-05-08
Supplement: s1 [file s1]

**Supplementary Table S1. Sequences of primers used in this manuscript**

| Gene        |         | Primer Sequence                |
|-------------|---------|--------------------------------|
| PGC         | Forward | 5'-CTCTGTCCGTGGATGAGGC-3'      |
|             | Reverse | 5'-CCAAAGACAACCGCTCCC-3'       |
| E-cadherin  | Forward | 5'-TTGACTTGAGCCAGCTGCACA-3'    |
|             | Reverse | 5'-GGAACCGCTTCCTTCATAGTC-3'    |
| N-cadherin  | Forward | 5'-GGCATAACCATG CCATCTT-3'     |
|             | Reverse | 5'-GTGCATGAAGGACAGCCTCT-3'     |
| Vimentin    | Forward | 5'-TGACCGCTTCGCCAACTACAT-3'    |
|             | Reverse | 5'-TCCCGCATCTCCTCCTCGTA-3'     |
| Snail       | Forward | 5'-AGGCAGCTATTTTCAGCCTCC-3'    |
|             | Reverse | 5'-CACATCGGTCAGACCAGAGC-3'     |
| Slug        | Forward | 5'-GCTACCCAATGGCCTCTCTC-3'     |
|             | Reverse | 5'-CTTCAATGGCATGGGGGTCT-3'     |
| Twist       | Forward | 5'-GCCAGGTACATCGACTTCCTCT-3'   |
|             | Reverse | 5'-TCCATCCTCCAGACCGAGAAGG-3'   |
| Fibronectin | Forward | 5'-CCCACCGTCTCAACATGCTTAG-3'   |
|             | Reverse | 5'-CTCGGCTTCCTCCATAACAAGTAC-3' |
| MMP2        | Forward | 5'-TACAGGATCATTGGCTACACACC-3'  |
|             | Reverse | 5'-GGTCACATCGCTCCAGACT-3'      |
| MMP9        | Forward | 5'-TGTACCGCTATGGTTACACTCG-3'   |
|             | Reverse | 5'-GGCAGGGACAGTTGCTTCT-3'      |
| MIST1       | Forward | 5'-AGGCCCTGCGTGAAGTCAT-3'      |
|             | Reverse | 5'-CCGTCAGCGATTTGATGTAGTTC-3'  |
| ATP4A       | Forward | 5'-TCACCACCGACGACAATCTG-3'     |
|             | Reverse | 5'-GGTGACGACAACCACAGCAA-3'     |

|         |         |                                  |
|---------|---------|----------------------------------|
| ATP4B   | Forward | 5'-GTCAGTTCCTGCCAAATCATC-3'      |
|         | Reverse | 5'-GGAGTTCGCACACTGACAACAC-3'     |
| TFF1    | Forward | 5'-GCCCTCCCAGTGTGCAAAT-3'        |
|         | Reverse | 5'-CGTCGATGGTATTAGGATAGAAGCA-3'  |
| TFF3    | Forward | 5'-CCCTGCAGGAAGCAGAATGC-3'       |
|         | Reverse | 5'-CGAAGAACTGTCTCGGGTG-3'        |
| MUC5AC  | Forward | 5'-CAGCACAACCCCTGTTTCAA-3'       |
|         | Reverse | 5'-GCGCACAGAGGATGACAGT-3'        |
| MUC6    | Forward | 5'-CAGCAGGAGGAGATCAGTTCAAG-3'    |
|         | Reverse | 5'-GTGGGTGTTTTCTGTCTGTCATC-3'    |
| GAST    | Forward | 5'-CCCAGCTCTGCAGACGAGAT-3'       |
|         | Reverse | 5'-GCCAGAGCCAGTGCAAAGAT-3'       |
| GKN1    | Forward | 5'-CAGTCAACCCAAACAAAGTCGAT-3'    |
|         | Reverse | 5'-CCCACGACACATGTTTGCAA-3'       |
| NEUROG3 | Forward | 5'-GACGGAGTCGGCGAAAGAA-3'        |
|         | Reverse | 5'-CCGAGTTGAGGTTGTGCATTTC-3'     |
| CD44    | Forward | 5'-TGATGGCACCCGCTATGTC-3'        |
|         | Reverse | 5'-AGCCGCTGCTCACGTCAT-3'         |
| CD133   | Forward | 5'-TCCCATAAAGCTGGACCCATT-3'      |
|         | Reverse | 5'-ATCACGCGGCTGTACCACAT-3'       |
| Bmi-1   | Forward | 5'-CGTGTATTGTTTCGTTACCTGGAGAC-3' |
|         | Reverse | 5'-CATTGGCAGCATCAGCAGAAGG-3'     |
| SOX2    | Forward | 5'-AGTCTCAAGCGACGAAAAA-3'        |
|         | Reverse | 5'-GCAGAAGCCTCCTCTTGAA-3'        |
| SOX9    | Forward | 5'-GCACTCATAATATGGCATCCTTCA-3'   |
|         | Reverse | 5'-AAACACGAACACAAACCAAAGCTT-3'   |

|                |         |                                 |
|----------------|---------|---------------------------------|
| VIL1           | Forward | 5'-CTACAGGAAGAAAACCTGGTCATCA-3' |
|                | Reverse | 5'-GCGCCCAGTCTTGTTGGA-3'        |
| 4-Oct          | Forward | 5'-GGTGGAGGAAGCTGACAACA-3'      |
|                | Reverse | 5'-TGATCTGCTGCAGTGTGGGA-3'      |
| IQGAP1         | Forward | 5'-TTGTTGCTCCTGATGCCTTTG-3'     |
|                | Reverse | 5'-GCAATGGAGCCCAGATTTTCG-3'     |
| $\beta$ -actin | Forward | 5'-ATGTGGCCGAGGACTTTGATT-3'     |
|                | Reverse | 5'-AGTGGGGTGGCTTTTAGGATG-3'     |

---

**Supplementary Table S2. The expression of differentiation and stemness markers in gastric cancer cells with PGC overexpression**

|                               | HGC27           | AGS             | MKN45           |
|-------------------------------|-----------------|-----------------|-----------------|
| <b>Differentiation marker</b> |                 |                 |                 |
| MIST1                         | upregulated     | not significant | not significant |
| ATP4A                         | not significant | not significant | not significant |
| ATP4B                         | not significant | not significant | not significant |
| TFF1                          | upregulated     | downregulated   | not significant |
| TFF3                          | not significant | not significant | not significant |
| MUC5AC                        | upregulated     | not significant | not significant |
| MUC6                          | upregulated     | not significant | not significant |
| GAST                          | upregulated     | not significant | not significant |
| GKNI                          | upregulated     | not significant | upregulated     |
| NEUROG3                       | not significant | not significant | not significant |
| <b>Stemness marker</b>        |                 |                 |                 |
| CD44                          | downregulated   | downregulated   | not significant |
| CD133                         | downregulated   | downregulated   | downregulated   |
| Bmi1                          | not significant | not significant | downregulated   |
| SOX2                          | downregulated   | downregulated   | downregulated   |
| SOX9                          | downregulated   | not significant | downregulated   |
| VIL1                          | downregulated   | downregulated   | not significant |
| OCT4                          | not significant | downregulated   | not significant |
