# Supplementary material for: Pepsinogen C Interacts with IQGAP1 to Inhibit the Metastasis of Gastric Cancer Cells by Suppressing Rho-GTPase Pathway
Source: MDPI journal article supplement (doi:10.3390/cancers16101796), 2024-05-08

Original WB figures of Figure 4A

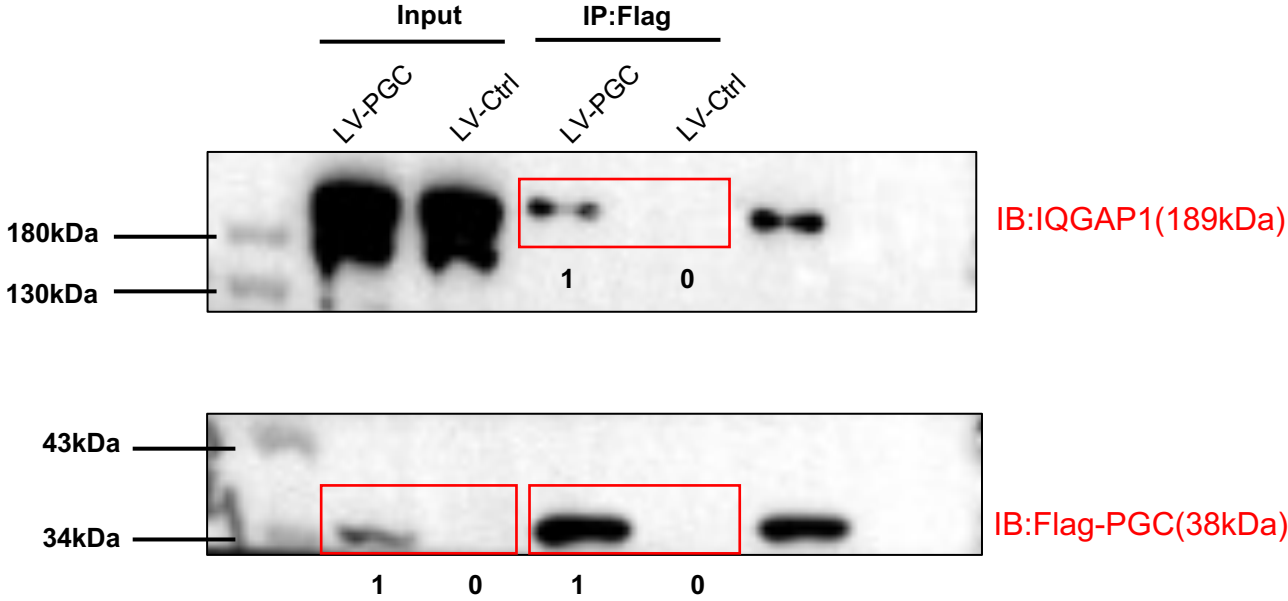

Original WB figures of Figure 4B

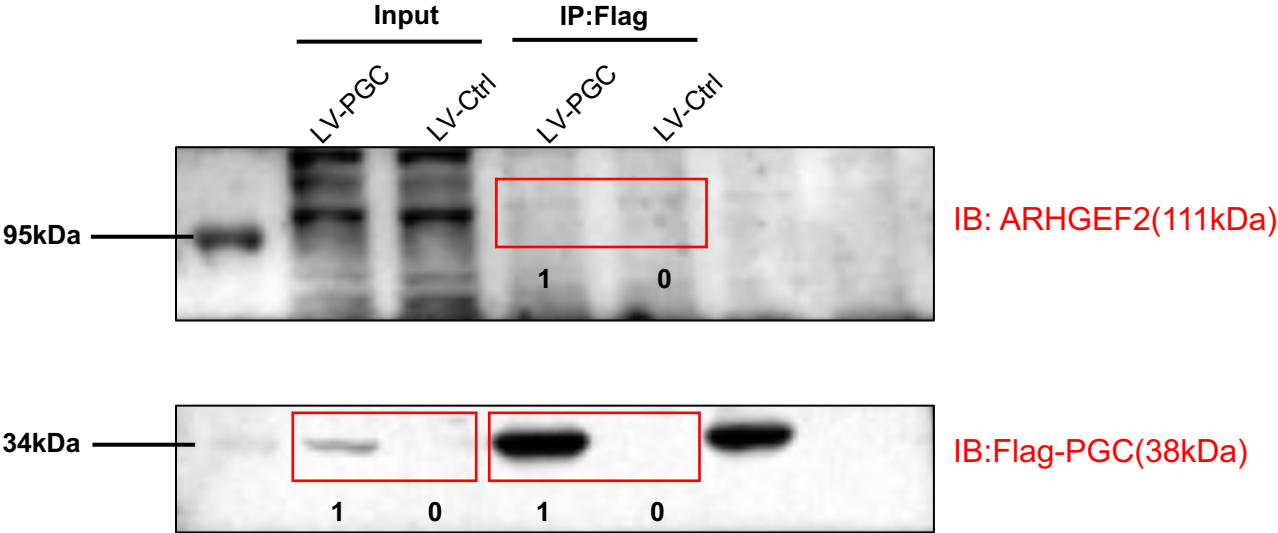

Original WB figures of Figure 4C

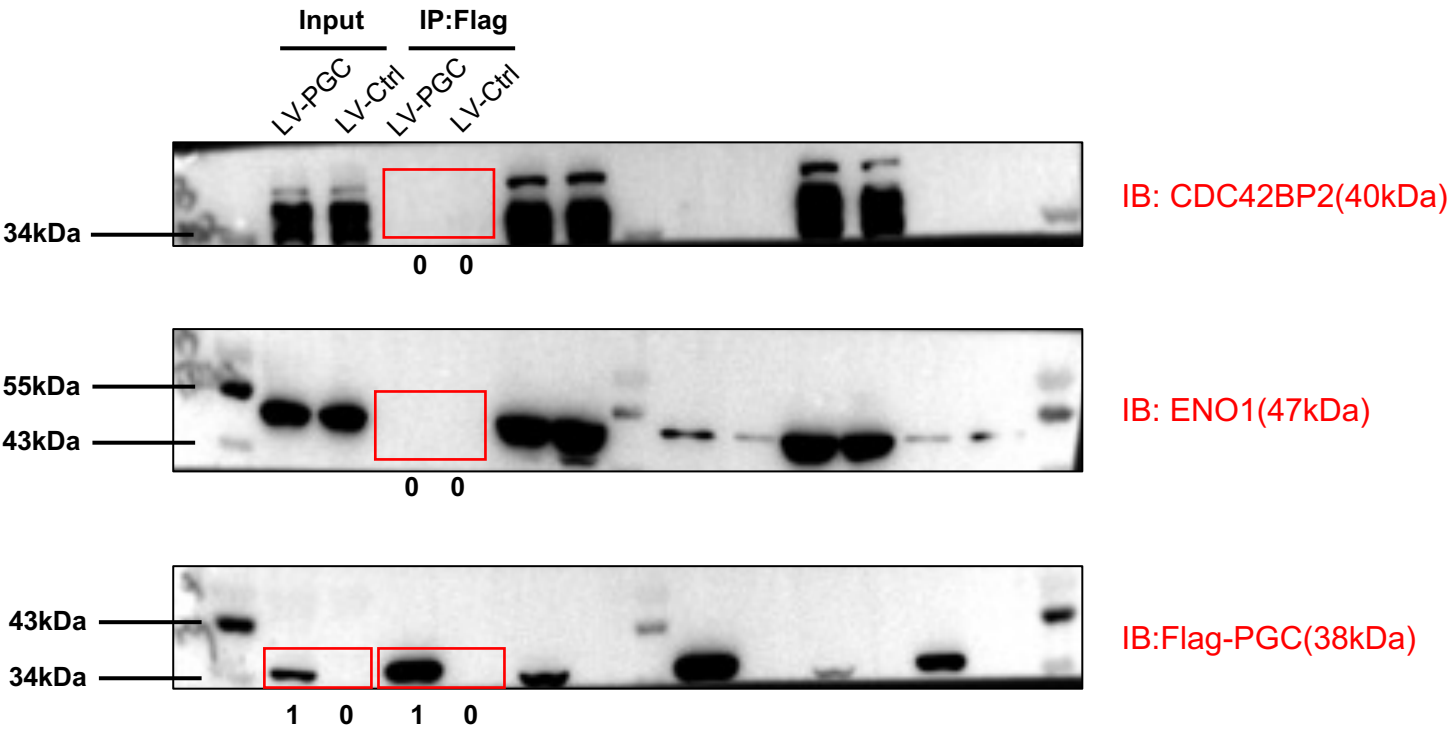

Original WB figures of Figure 4D

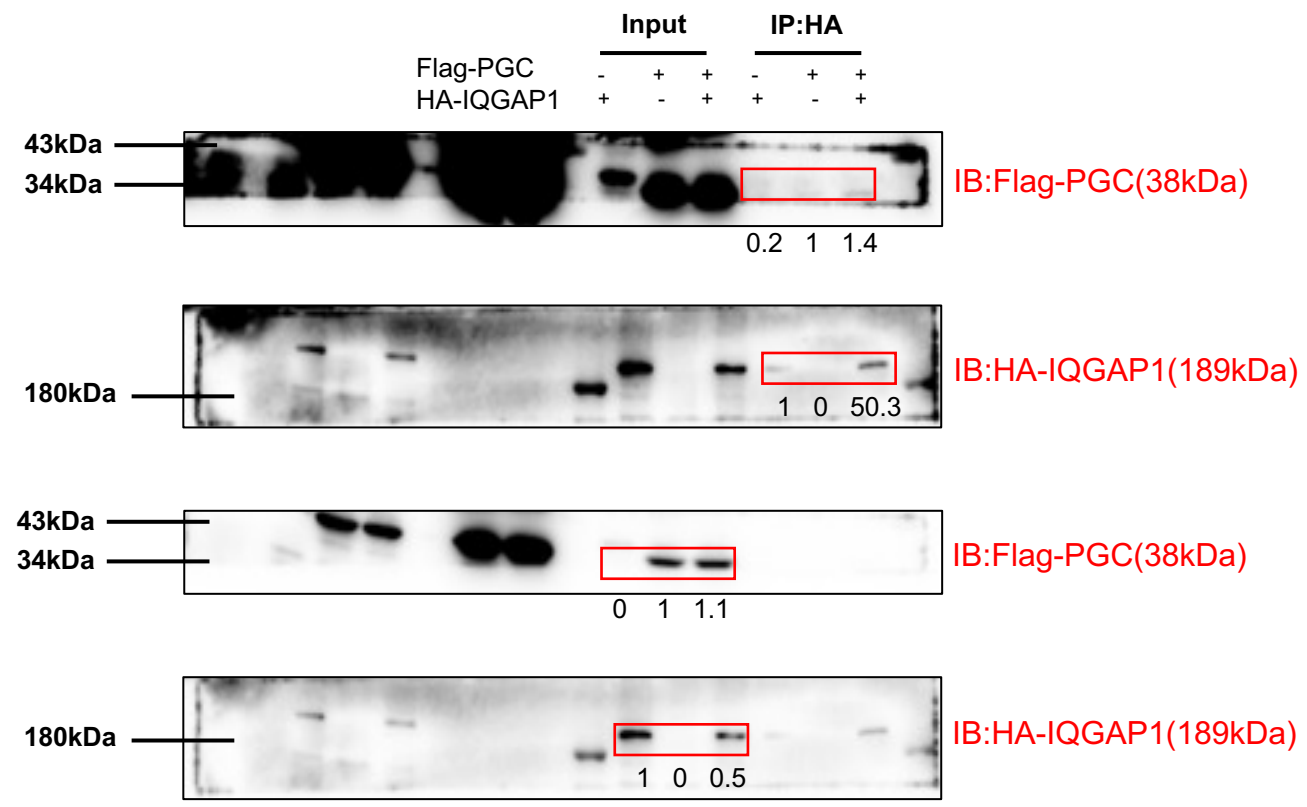

Original WB figures of Figure 4G

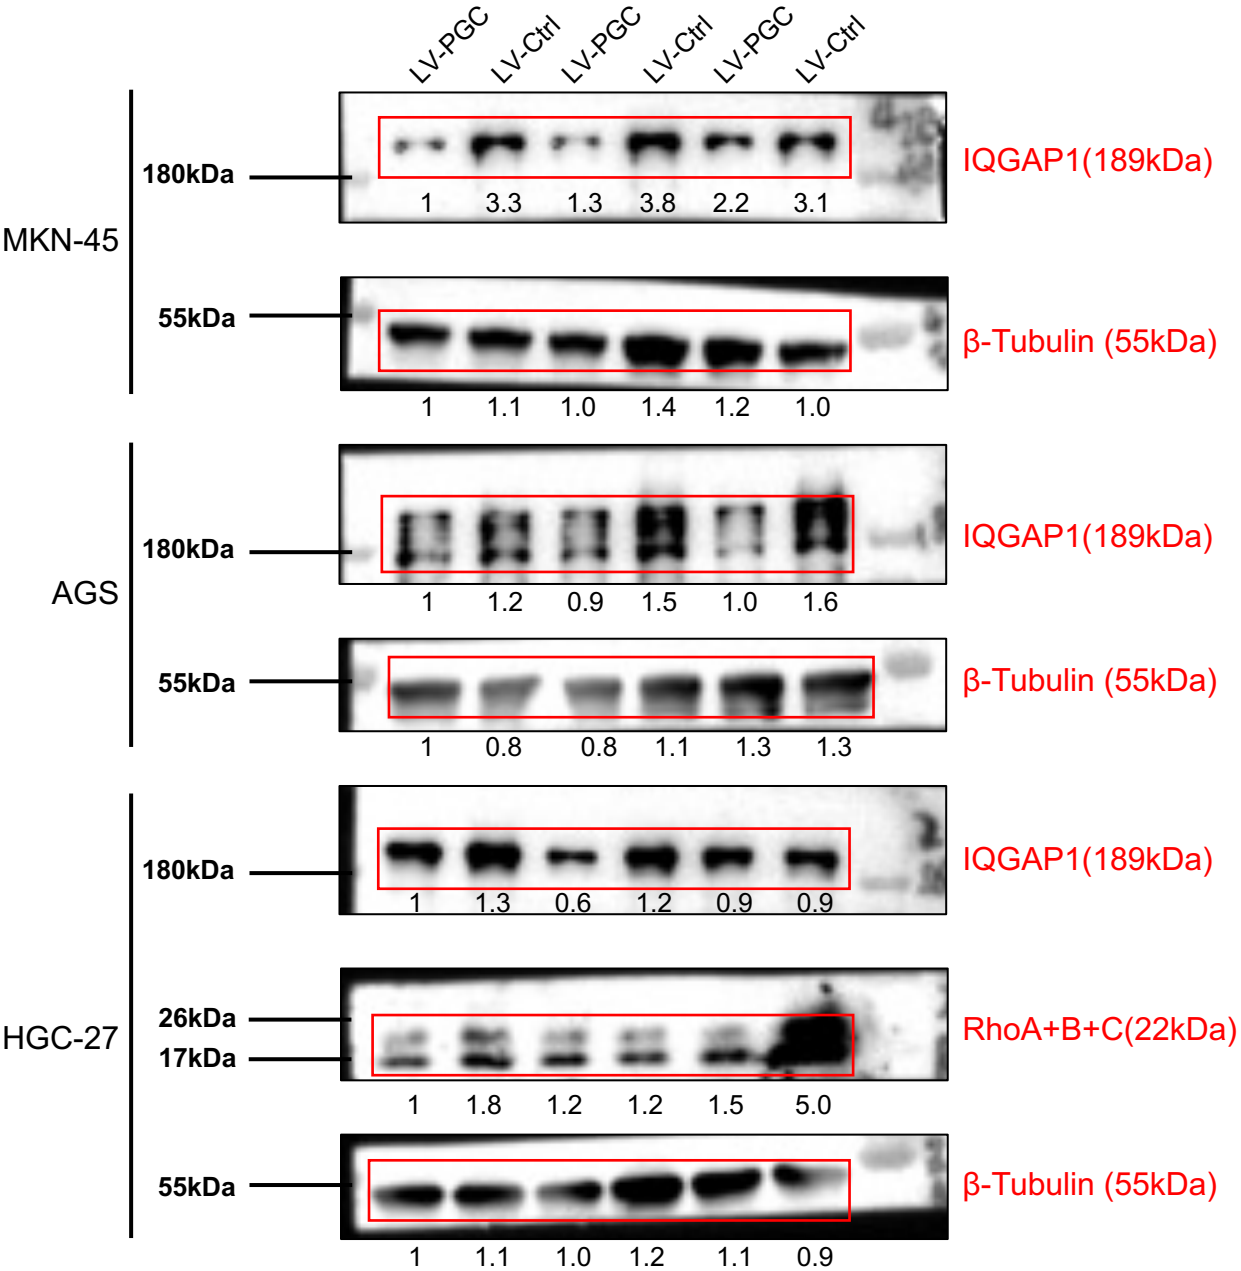

# Original WB figures of Figure 4I

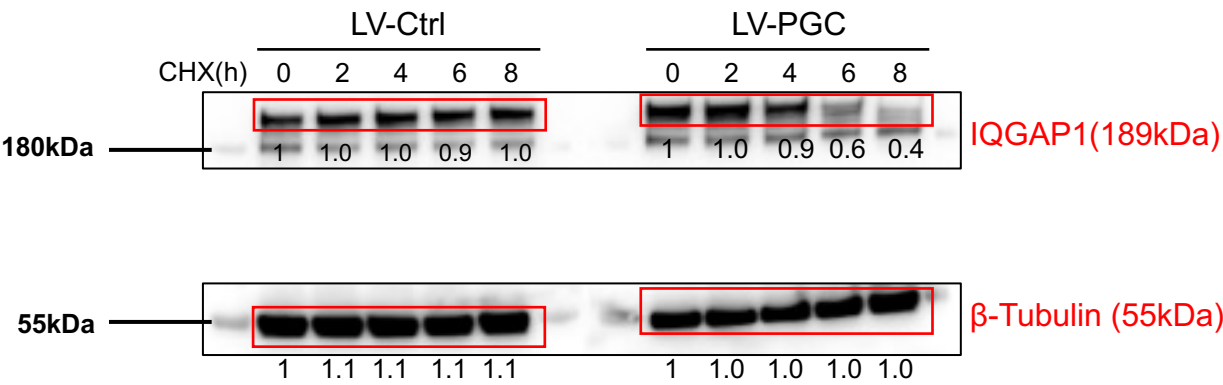

# Original WB figures of Figure 4J

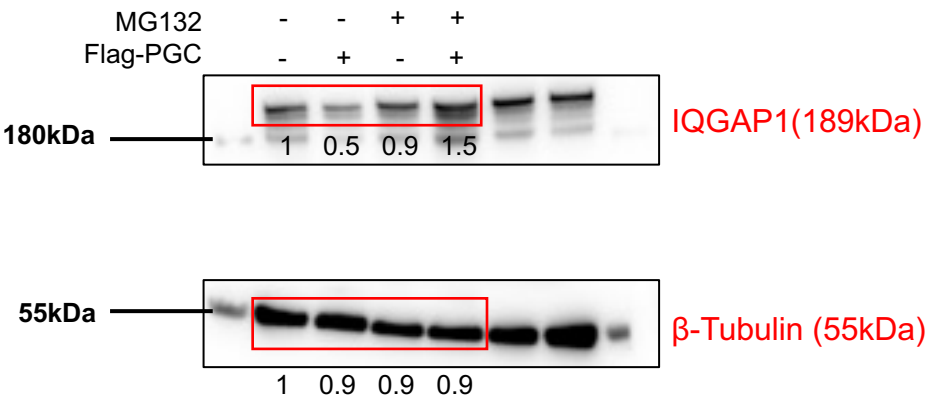

Original WB figures of Figure 5G

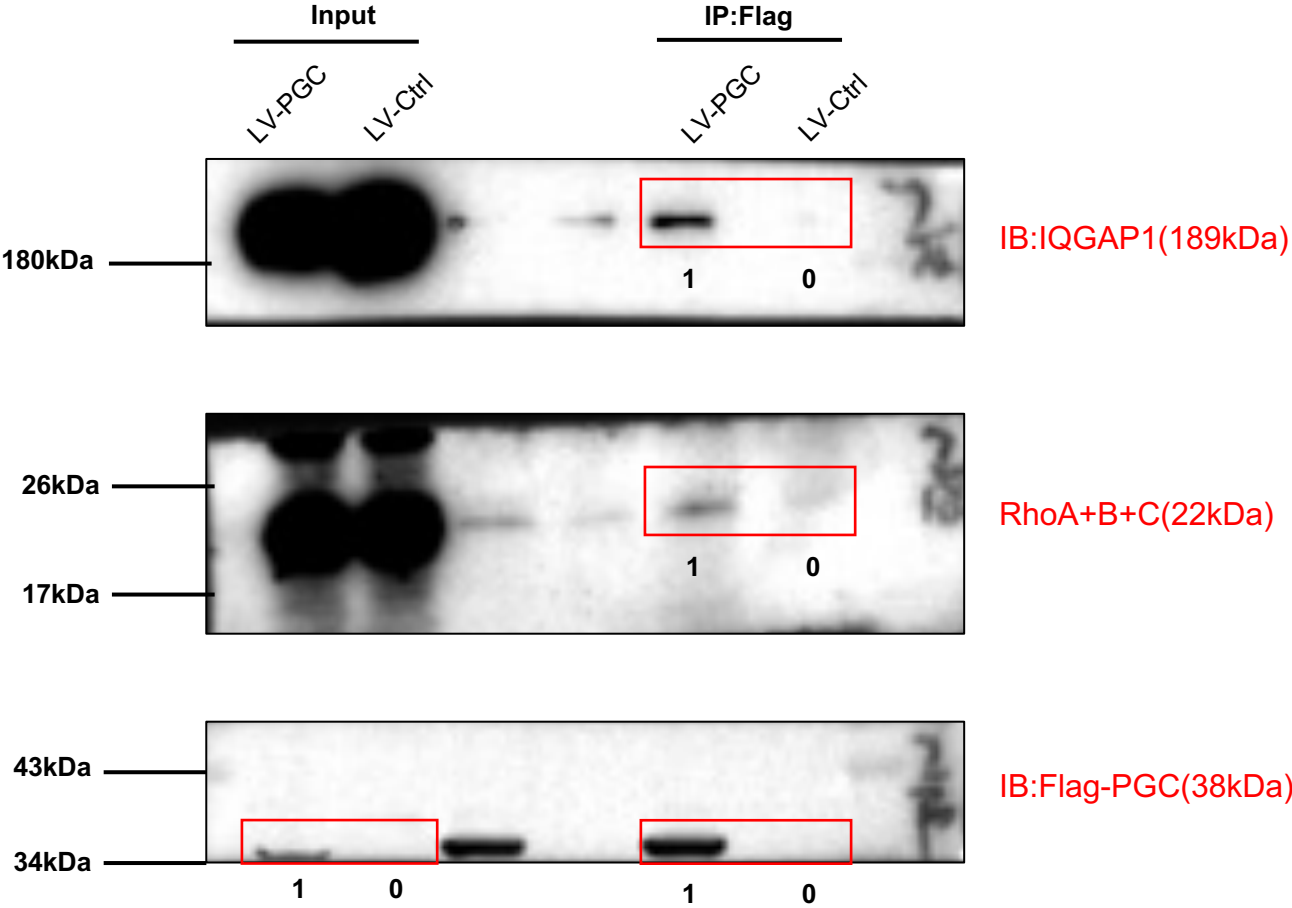

Original WB figures of Figure S1D

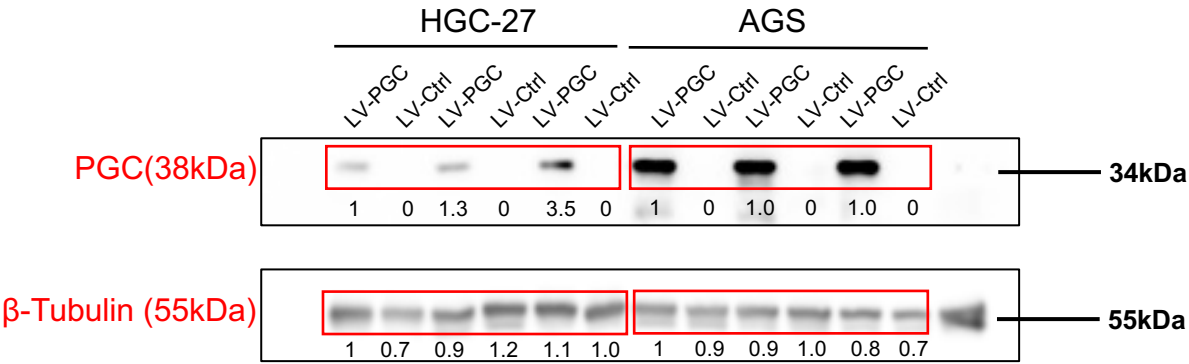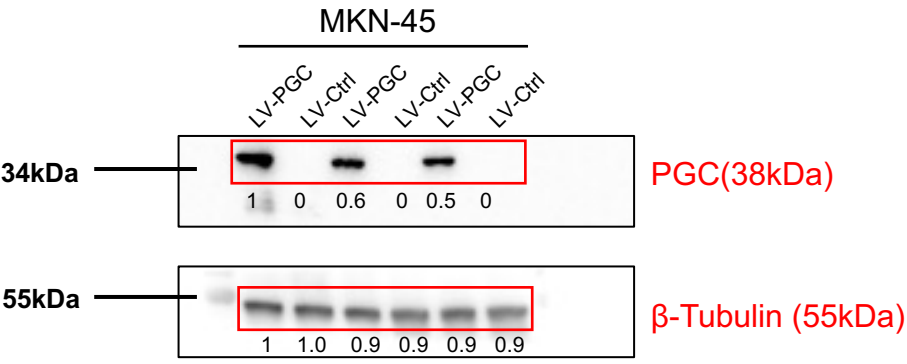

Supplement: s1 [file s1]
