# Supplementary material for: Pepsinogen C Interacts with IQGAP1 to Inhibit the Metastasis of Gastric Cancer Cells by Suppressing Rho-GTPase Pathway
Source: MDPI journal article supplement (doi:10.3390/cancers16101796), 2024-05-08
Supplement: s1 [file s1]

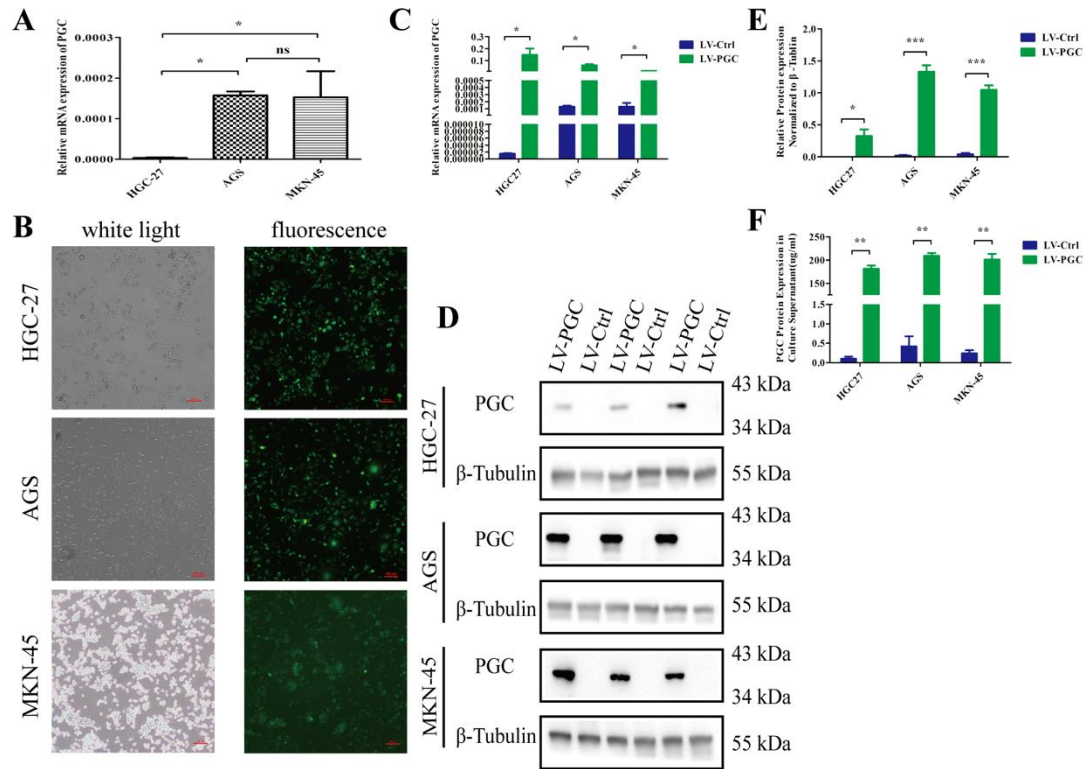

**Figure S1.** The overexpression efficiency of PGC. **A** Background expression of PGC in the three GC cell lines. **B** Fluorescence microscopy observation of PGC-lentivirus infection efficiency in HGC-27, AGS, and MKN-45 cells (100×). **C-E** qRT-PCR (**C**), WB (**D-E**), and ELISA (**F**) were used to determine the overexpression efficiency of PGC. The results suggested that the PGC overexpression model was successfully constructed (\* $p < 0.05$ , \*\* $p < 0.01$ , \*\*\* $p < 0.001$ , ns,  $p > 0.05$ ).

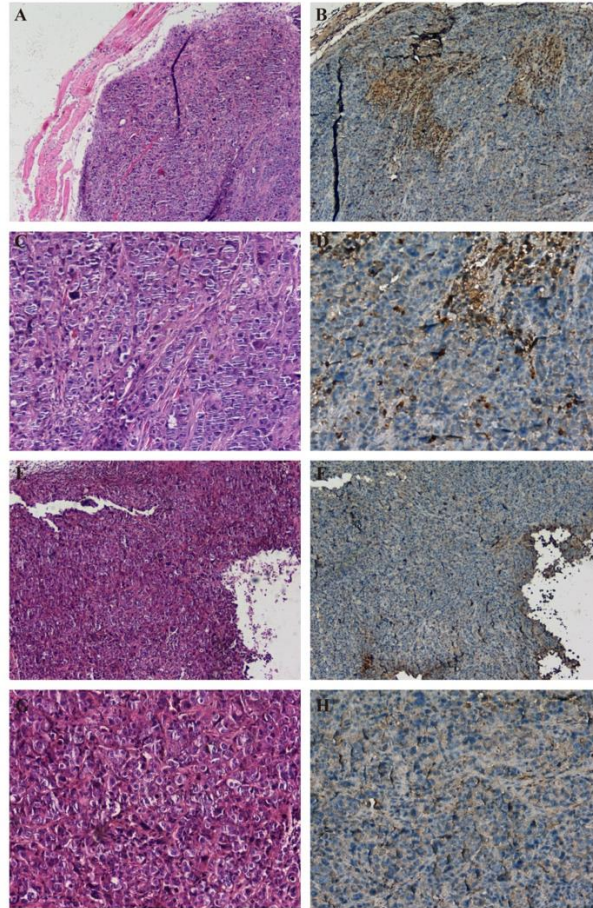

**Figure S2.** HE staining and PGC immunohistochemical staining of xenograft tissues. **A-D** The expression of PGC in the xenografts of the stably expressing PGC group (LV-PGC) was positive. **E-H** The expression of PGC in the xenografts of the negative control vector group (LV-Ctrl) was negative.

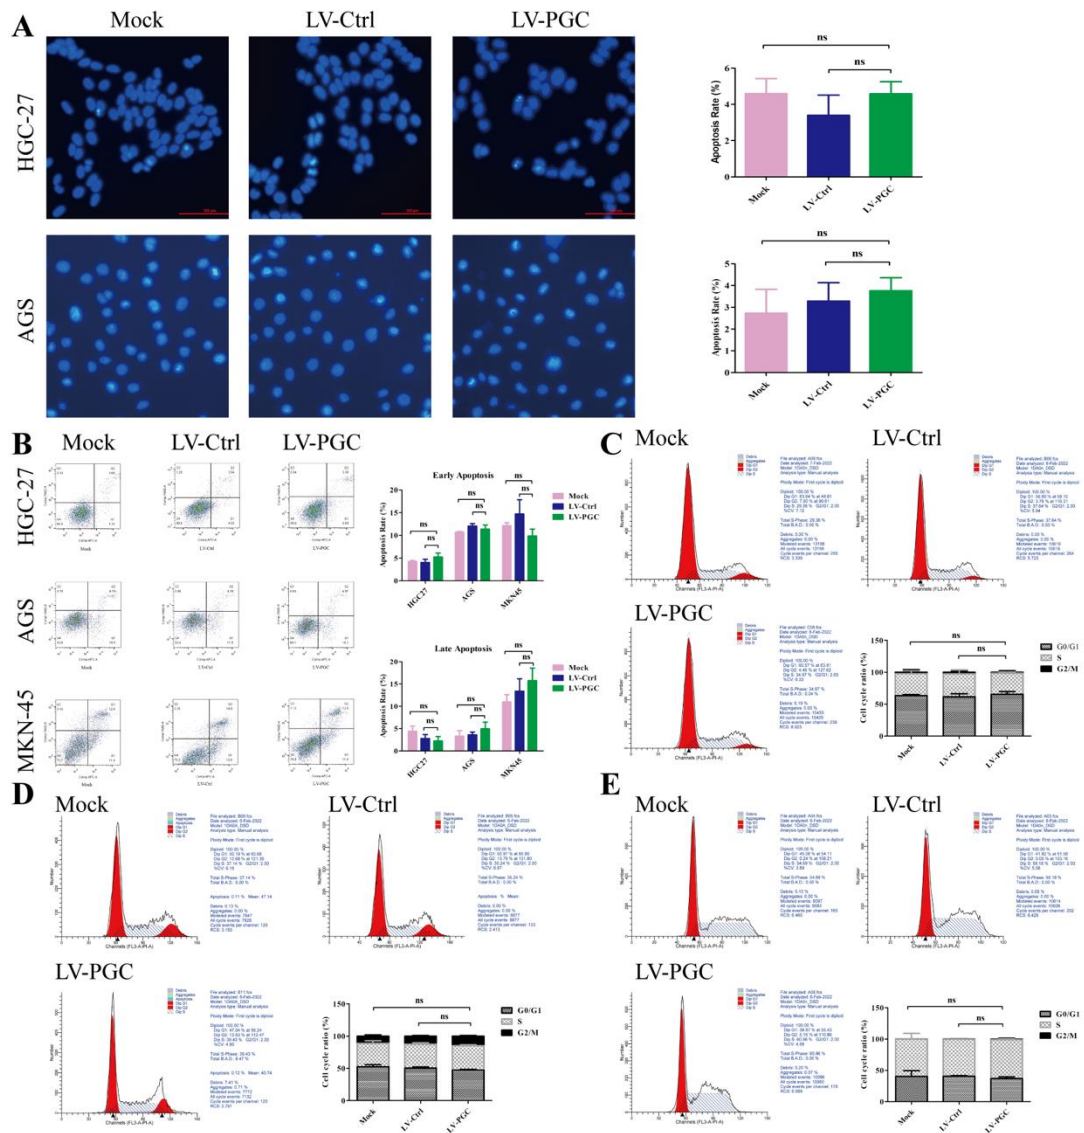

**Figure S3.** PGC is not correlated with GC cells apoptosis or cell cycle progression. **A-B** Cell apoptosis was measured after the transfection of HGC-27, AGS, and MKN-45 cells with LV-PGC and LV-Ctrl by using Hoechst staining assays (**A**) and flow cytometry (**B**). The results suggested that PGC did not affect GC cell apoptosis. **C-E** Cell cycle progression was evaluated after the transfection of HGC-27 and AGS cells with LV-PGC and LV-Ctrl by using flow cytometry. The results showed that PGC did not affect the phase distribution of GC cells.
