# Supplementary material for: Pepsinogen C Interacts with IQGAP1 to Inhibit the Metastasis of Gastric Cancer Cells by Suppressing Rho-GTPase Pathway
Source: Cancers (Basel). 2024 May 8;16(10):1796. doi: 10.3390/cancers16101796 (PMC11120368; doi:10.3390/cancers16101796)
Supplement: Supplementary file 1 [file cancers-16-01796-s001.zip]

Archive with 4 entries (4 files):
- Original WB Figures0508.pdf
- Supplementary Materials-Figures.pdf
- Supplementary Materials-Tables.pdf
- Supplementary Materials.pdf
